# Supplementary material for: Selective hydrogenation of furfural for high-value chemicals: effect of catalysts and temperature
Source: Royal Society of Chemistry journal article supplement (doi:10.1039/d0se01090a), 2020-01-01
Supplement: d0se01090a1.pdf [file d0se01090a1.pdf]

# Selective Hydrogenation of Furfural for High-value Chemicals: Effect of Catalysts and Temperature

Haihong Xia<sup>ab†</sup>, Changzhou Chen<sup>ab†</sup>, Peng Liu<sup>ab</sup>, Minghao Zhou<sup>ab\*</sup>, Jianchun  
Jiang<sup>ab\*</sup>

*a. Institute of Chemical Industry of Forest Products, Chinese Academy of  
Forestry; Key Lab. of Biomass Energy and Material, Jiangsu Province;  
National Engineering Lab. for Biomass Chemical Utilization; Key and Open  
Lab. on Forest Chemical Engineering, SFA, Nanjing 210042, China*

*b. Co-Innovation Center of Efficient Processing and Utilization of Forest  
Resources, Nanjing Forestry University, Nanjing 210037, China*

\* Corresponding Author: E-mail: zmhzyk19871120@163.com (Minghao Zhou)  
jiangjc@icifp.cn (Jianchun Jiang)

†These authors contributed equally: Haihong Xia and Changzhou Chen

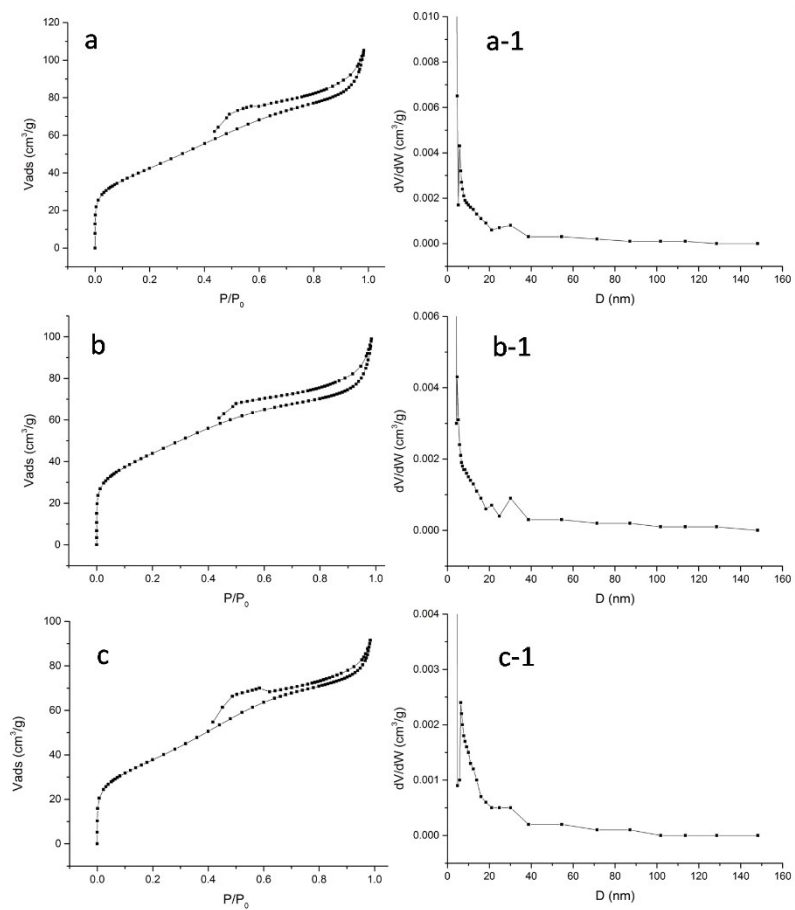

Figure S1. N<sub>2</sub> adsorption isotherms (a), Ni<sub>3</sub>Co<sub>1</sub>@C, (b) Ni<sub>2</sub>Co<sub>1</sub>@C, (c) Ni<sub>1</sub>Co<sub>1</sub>@C and pore-size distributions (a-1), Ni<sub>3</sub>Co<sub>1</sub>@C, (b-1) Ni<sub>2</sub>Co<sub>1</sub>@C, (c-1) Ni<sub>1</sub>Co<sub>1</sub>@C

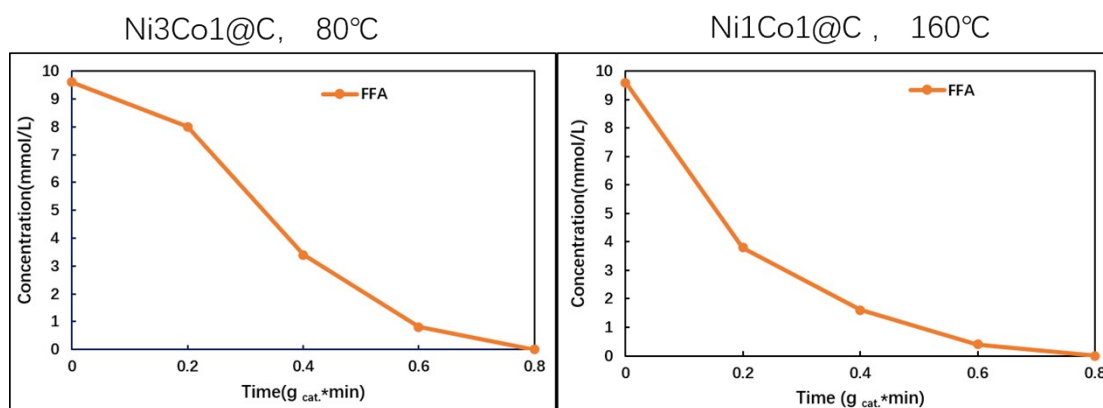

Fig S2. Concentration profiles for FFA hydrogenation.

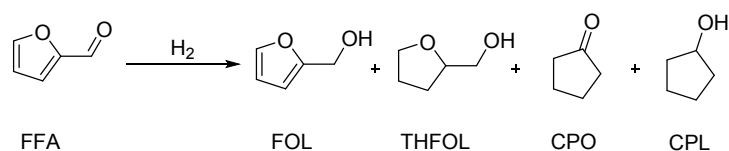

Table S1. Optimization of different catalysts of FFA hydrogenation

| Entry | T(°C) | Cat.     | Initial reaction rate <sup>a</sup> (mmol/g <sub>cat</sub> *min) | TOF(min <sup>-1</sup> ) | FOL Yield(%) | THFO L Yield(%) | CPO Yield(%) | CPL Yield(%) |
|-------|-------|----------|-----------------------------------------------------------------|-------------------------|--------------|-----------------|--------------|--------------|
| 1     | 80    | Ni3Co1@C | 1.55                                                            | 53                      | 4            | 95              | 0            | 0            |
| 2     | 160   | Ni1Co1@C | 1.92                                                            | 104                     | 0            | 0               | 0            | 96           |

<sup>a</sup>Within the first 0.4 g<sub>cat</sub>\*min of reaction.
